# Supplementary material for: A conductive and sodiophilic Ag coating layer regulating Na deposition behaviors for highly reversible sodium metal batteries
Source: Royal Society of Chemistry journal article supplement (doi:10.1039/d3sc06468a), 2024-01-01
Supplement: d3sc06468a1.pdf [file d3sc06468a1.pdf]

1 **Supporting Information**

2 **Conductive and Sodiophilic Ag Coating Layer Regulating Na Deposition**

3 **Behaviors for Highly Reversible Sodium Metal Battery**

4

5 Xiaomin Chen,<sup>+a</sup> Xunzhu Zhou,<sup>+a,b</sup> Zhuo Yang,<sup>a</sup> Zhiqiang Hao,<sup>a,b</sup> Jian Chen,<sup>a</sup> Wenxi Kuang,<sup>a</sup> Xiaoyan

6 Shi,<sup>a</sup> Xingqiao Wu,<sup>a,b</sup> Lin Li<sup>\*a,b</sup>, and Shu-Lei Chou<sup>\*a,b</sup>

7

8 [a] X. Chen, Dr. X. Zhou, Z. Yang, Dr. Z. Hao, J. Chen, W. Kuang, X. Shi, Prof. X. Wu, Prof. L. Li,

9 Prof. S.-L. Chou

10 Department Institute for Carbon Neutralization, College of Chemistry and Materials Engineering,

11 Wenzhou University

12 Wenzhou, Zhejiang 325035, China

13 E-mail: linli@wzu.edu.cn; chou@wzu.edu.cn

14 [b] Dr. X. Zhou, Dr. Z. Hao, Prof. X. Wu, Prof. L. Li, Prof. S.-L. Chou

15 Wenzhou Key Laboratory of Sodium-Ion Batteries, Wenzhou University Technology Innovation

16 Institute for Carbon Neutralization

17 Wenzhou, Zhejiang 325035, China

18

19 <sup>+</sup> These authors contributed equally: Xiaomin Chen, Xunzhu Zhou

## 1 Experimental Procedures

2 **Materials.** Sodium hexafluorophosphate (NaPF<sub>6</sub>, battery-grade) and diethylene glycol dimethyl ether  
3 (G2, battery-grade) were purchased from Duoduo chemical reagent Co., Ltd. The electrolyte of 1.0 M  
4 NaPF<sub>6</sub>-G2 was mixed inside a glove box with O<sub>2</sub> and H<sub>2</sub>O content < 0.1 ppm. Na metal (99.7%, Aladdin)  
5 was rolled and pressed as Na chips (10 mm diameter) before assembling batteries.

6 Preparation of Zn@Ag electrode: Ag was deposited on commercial Zn foil by thermal evaporation  
7 and magnetron sputtering. 50 nm is the set value on high vacuum resistance evaporation coating machine  
8 (ZD-400). The Cu/Zn/Zn@Ag foils were then cut into 10 mm circular pieces.

9 80% commercial Prussian blue (PB), 10% ketjen black (KB) and 10% water-based binder was used  
10 to prepare the cathode slurry. And then, the slurry was coated onto an aluminum foil and dried at 80 °C  
11 for 12 h in vacuum. In addition, the cathode electrodes were dehydrated at 180 °C for 2 h before  
12 assembling the batteries. The active material loading is ca. 1.0 mg cm<sup>-2</sup> on each electrode. High loading  
13 PB cathode for assembling the anode-free batteries is ca. 12.0 mg cm<sup>-2</sup>.

14 **Electrochemical measurements and cell assembly.** CR2032-type coin cells were assembled in an  
15 Ar-filled glovebox. Al<sub>2</sub>O<sub>3</sub>-Polypropylene (PP) separator is selected as the separator with 60 μL  
16 electrolyte. The performance of these cells was tested on a NEWARE battery cycler (CT-3008W). The  
17 Tafel plot, electrochemical impedance spectroscopy (EIS), and cyclic voltammetry (CV) were measured  
18 on a CHI600C electrochemical workstation (Chenhua).

19 **Tafel plots:** Symmetric Zn-Na||Zn-Na and Zn@Ag-Na||Zn@Ag-Na cells are assembled in Figure 3d,  
20 where 1.0 mAh cm<sup>-2</sup> Na was pre-deposited. The exchange current density was calculated by Tafel curve  
21 to evaluate the ion transfer kinetics at the electrode-electrolyte interface. The scan rate is 1.0 mV s<sup>-1</sup>, the  
22 voltage range is from -0.02 V to 0.02 V. The relationship between overpotential (η) and current density  
23 (i) in Tafel formula is as follows:<sup>[1]</sup>

24  $\eta = a + b \times \log|i|$  (Eq. S1)

25 where the constant a is the overpotential when i is equal to the unit current density, and the constant  
26 b is termed the Tafel slope.

1     **Electrochemical impedance spectroscopy (EIS):** Symmetric Zn-Na||Zn-Na and Zn@Ag-  
2 Na||Zn@Ag-Na cells are assembled in Figure 3e, 5a and S6, where 1.0 mAh cm<sup>-2</sup> Na was pre-deposited.  
3 EIS was recorded from 100 kHz to 0.01 Hz. The activation energy is calculated through varying-  
4 temperature EIS from 273 to 323 K based on the Arrhenius formula.

5     **Cyclic voltammetry (CV):** Zn-Na||PB and Zn@Ag-Na||PB cells are assembled in Figure 4a, where  
6 1.0 mAh cm<sup>-2</sup> Na was pre-deposited. CV was carried out with the scan rate of 0.1 mV s<sup>-1</sup> at 1.5-3.7 V.

7     **Other electrochemical performance:** Long-term cycling performance of Zn-Na||Na and Zn@Ag-  
8 Na||Na cells were assembled in Figure 3a and 3b with the current density of 0.5 mA cm<sup>-2</sup> for 3 h, where  
9 2.0 mAh cm<sup>-2</sup> Na was pre-deposited. The rate performance of Zn-Na||Na and Zn@Ag-Na||Na cells were  
10 assembled in Figure 3c with the current density of 1.0 to 5.0 mA cm<sup>-2</sup> for 1 h, where 6.0 mAh cm<sup>-2</sup> Na  
11 was pre-deposited. The thickness of Na foil is 0.448 mm.

12     Long-term cycling of symmetric Zn-Na||Zn-Na and Zn@Ag-Na||Zn@Ag-Na cells were assembled in  
13 Figure S5 with the current density of 0.5 mA cm<sup>-2</sup> for 3 h, where 2.0 mAh cm<sup>-2</sup> Na was pre-deposited.  
14 Nucleation overpotential is tested by the asymmetric Zn||Na, Zn@Ag||Na, Cu||Na or Al||Na cells in  
15 Figure 2a and S1 with the current density of 0.5 mA cm<sup>-2</sup>. And the same assembly is appropriate for the  
16 Coulombic efficiency in Figure 3f and S7-10. The current density is 0.5 mA cm<sup>-2</sup> in Figure 3f and S7-9  
17 and 1.0 mA cm<sup>-2</sup> in Figure S10.

18     Half Na||PB cells are assembled in Figure S11 for comparison with the current density of 50 mA g<sup>-1</sup>.  
19     Anode-less Zn-Na||PB, Zn@Ag-Na||PB, Cu-Na||PB, and Al-Na||PB cells are assembled in Figure 4b-  
20 4g, S10 and S12-15, where 1.0 mAh cm<sup>-2</sup> Na was pre-deposited. The current density is 50 mA g<sup>-1</sup> or  
21 100 mA g<sup>-1</sup>.

22     Anode-free Zn||PB, Zn@Ag||PB, Cu||PB, and Al||PB cells are assembled in Figure 5c-5e and S16,  
23 with the charge current density of 20 mA g<sup>-1</sup> and discharge current density of 50 mA g<sup>-1</sup>.

24     **Characterizations.** The morphology and thickness of deposited Na on Zn and Zn@Ag foils were  
25 observed via scanning electron microscopy (SEM 3100, CIQTEK Ltd.). The wettability of electrolyte  
26 on Zn foil or Zn@Ag foil was tested by contact angle system (CA100C, INNUO Ltd.).

1     **Theoretical calculations.** Density functional theory (DFT) calculations were carried out using the  
2 Gaussian 09 package. Such calculations were performed using Vienna ab-initio simulation package  
3 (VASP) with the generalized gradient approximation (GGA) and the Perdew-Burke-Eznerhof (PBE)  
4 functional (GGA-PBE) to describe the exchange-correlation energy of electrons.<sup>[2]</sup> DFT calculations  
5 were applied to calculate the adsorption energy between a Na atom and the metal surfaces with largest  
6 XRD intensity, namely, Ag (100) and Zn (101).

7

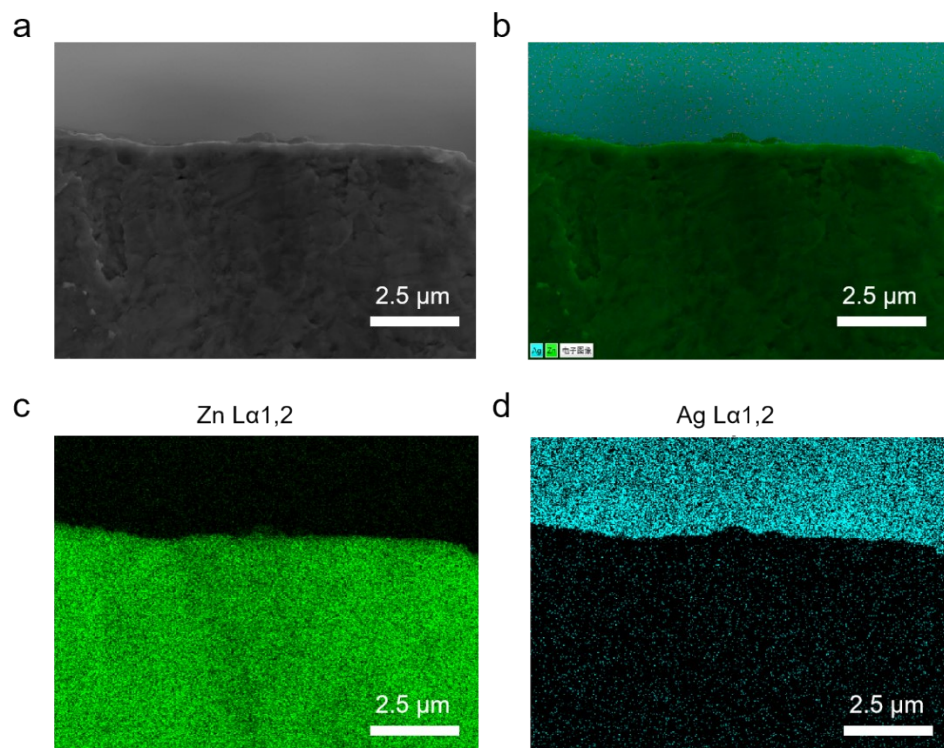

1

2 **Figure S1.** (a) SEM image of Zn@Ag substrate and (b-d) the corresponding elemental mapping images.

3

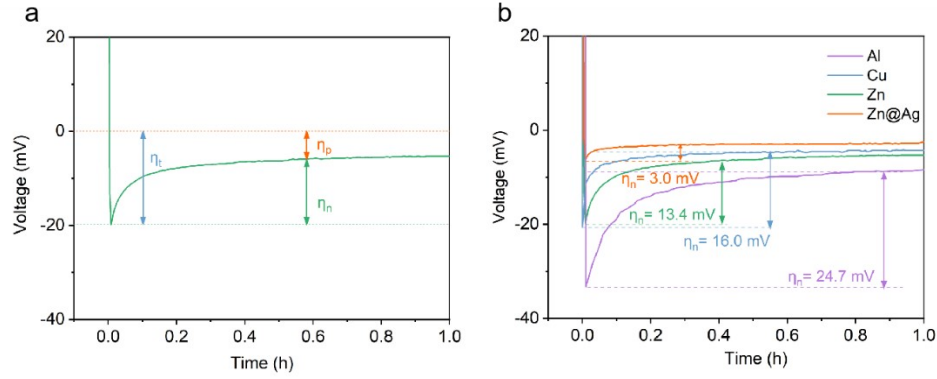

1  
2 **Figure S2.** (a) Schematic diagram of tip overpotential ( $\eta_t$ ), plateau overpotential ( $\eta_p$ ) and nucleation  
3 overpotential ( $\eta_n$ ), where  $\eta_n$  is defined as the voltage gap between  $\eta_t$  and  $\eta_p$ . (b) Galvanostatic discharge  
4 voltage profiles of Na deposition at 0.5 mA cm<sup>-2</sup> on Al, Cu, Zn and Zn@Ag substrate.

5  
6 According to the classical nucleation theory, the Gibbs free energy of the heterogeneous nucleus is  
7 calculated as following:<sup>[3-5]</sup>

$$\Delta g_{multi} = \Delta g_{bulk} + \Delta g_{surf} = -\frac{2\pi r^3 z F \eta}{3 V_m} + 2\pi r^2 \gamma_{SL} \quad (Eq. S2)$$

8  
9 where  $V_m$  is the molar volume of Zn,  $\gamma_{SL}$  the surface free energy of Zn-electrolyte interface,  $z$  the number  
10 of electrons per monomer unit,  $F$  the Faraday's constant,  $\eta$  the nucleation overpotential. From the  
11 equation  $d\Delta g_{multi}/dr = 0$ , the critical nucleation radius  $r_{crit}$  can be obtained:

$$r_{crit} = \frac{2V_m \gamma_{SL}}{zF\eta} \quad (Eq. S3)$$

12  
13 For a semi-spherical nucleus, the critical nucleation volume  $V_{crit} = \frac{1}{2} \frac{4\pi}{3} r_{crit}^3$ . By inserting  $V_{crit}$  one  
14 obtains the areal nucleation density  $N_{crit}$ :

$$N_{crit} = \frac{3z^3 F^3 \eta^3}{16\pi N_A V_m^2 \gamma_{SL}^3} \quad (Eq. S4)$$

15  
16 where  $N_A$  is the Avogadro constant.

1     In a fixed electrolyte, nucleation overpotential  $\eta_n$  play a crucial role on regulating the initial nucleation  
2   behavior. That is, the initial nucleus size is inversely proportional to nucleation overpotential, and the  
3   nucleation density is proportional to the cube of nucleation overpotential.

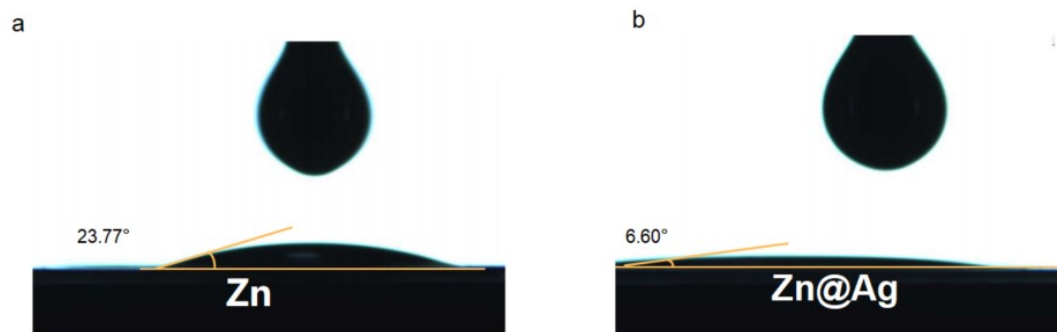

1

2 **Figure S3.** Contact angle of 1.0 M NaPF<sub>6</sub>-G2 electrolyte on (a) Zn and (b) Zn@Ag substrates.

3

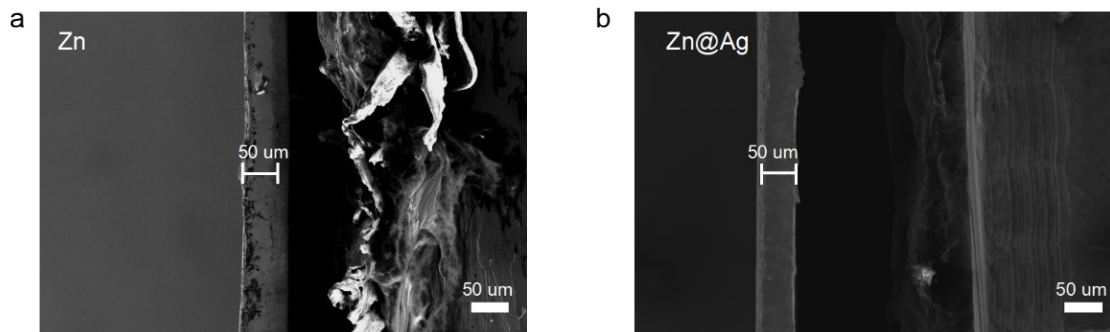

1  
2 **Figure S4.** Cross-sectional SEM images of pristine (a) Zn foil and (b) Zn@Ag foil.

3

1

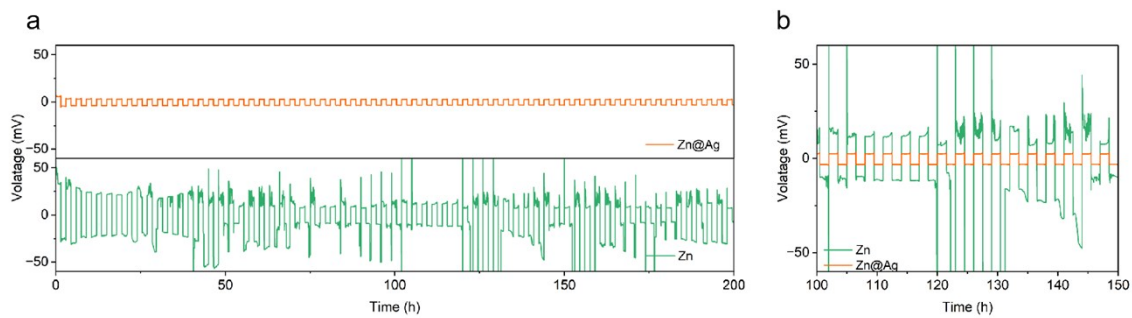

2

3 **Figure S5.** (a) Long-term cycling of Zn-Na||Zn-Na and Zn@Ag-Na||Zn@Ag-Na cells and (b) the  
 4 corresponding enlarged voltage-time profiles with the current density is  $0.5 \text{ mA cm}^{-2}$  for 3 h. The pre-  
 5 deposited Na is  $2.0 \text{ mAh cm}^{-2}$ .

6

1  
2

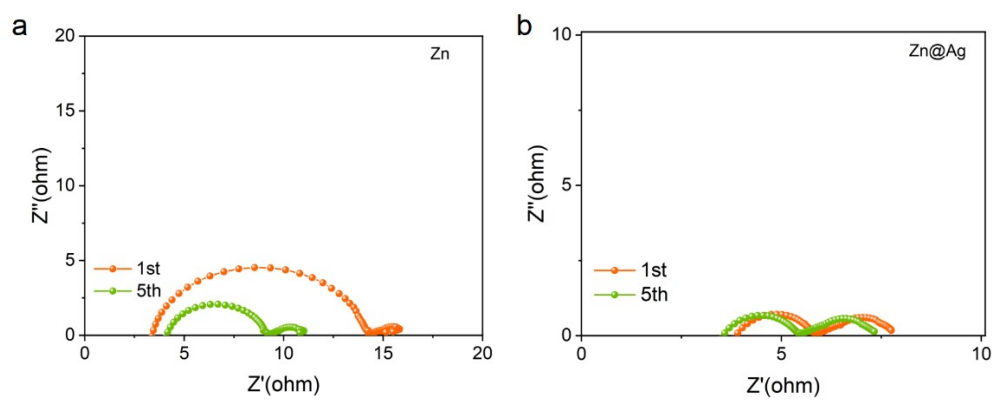

3

4 **Figure S6.** Comparison of EIS of (a) Zn-Na||Na and (b) Zn@Ag-Na||Na cells after the first and fifth

5 cycles.

6

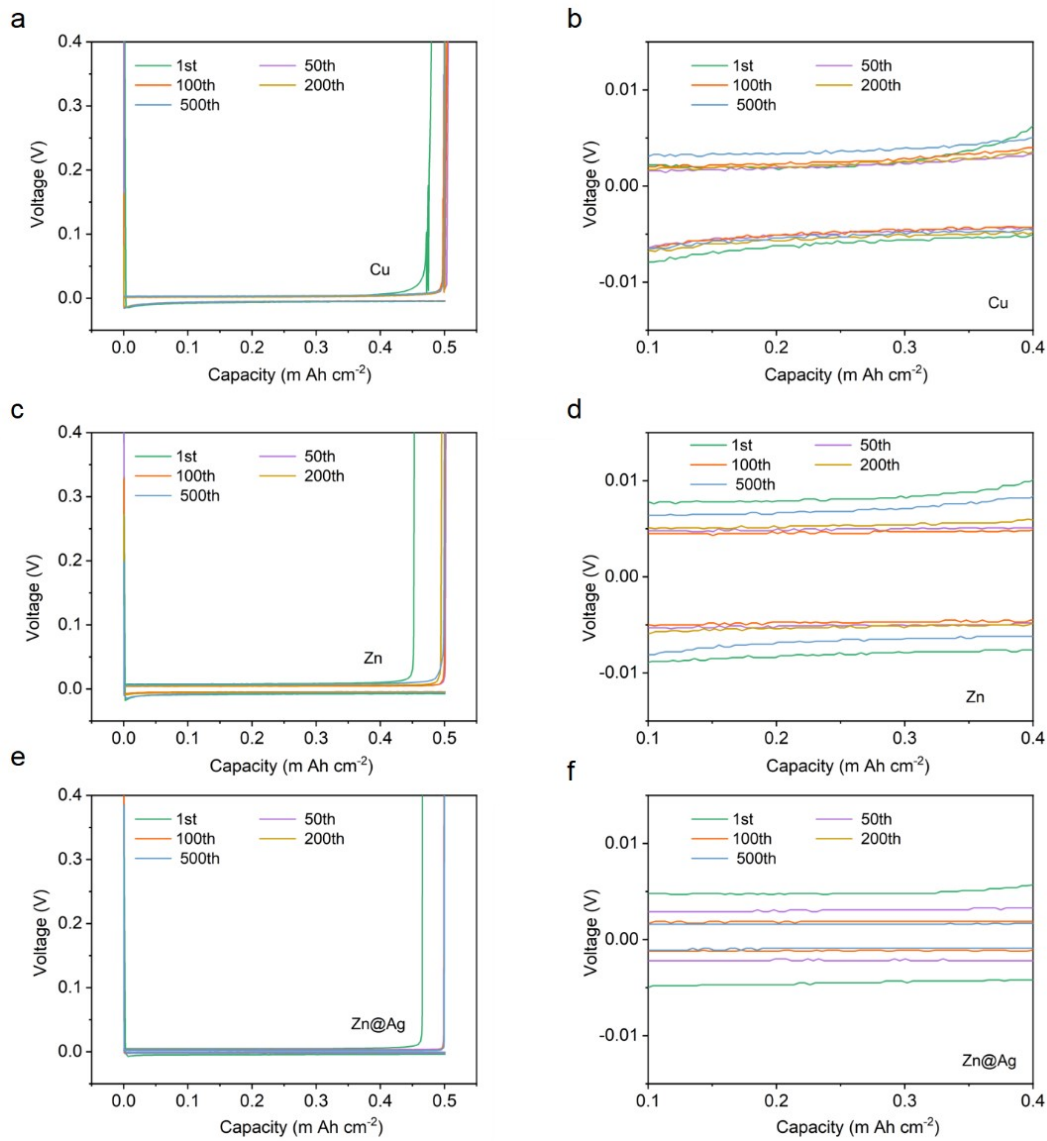

1  
2 **Figure S7.** Galvanostatic Na plating/stripping voltage profiles at selected cycles of (a, b) Cu||Na, (c, d)  
3 Zn||Na, and (e, f) Zn@Ag||Na cells.

4

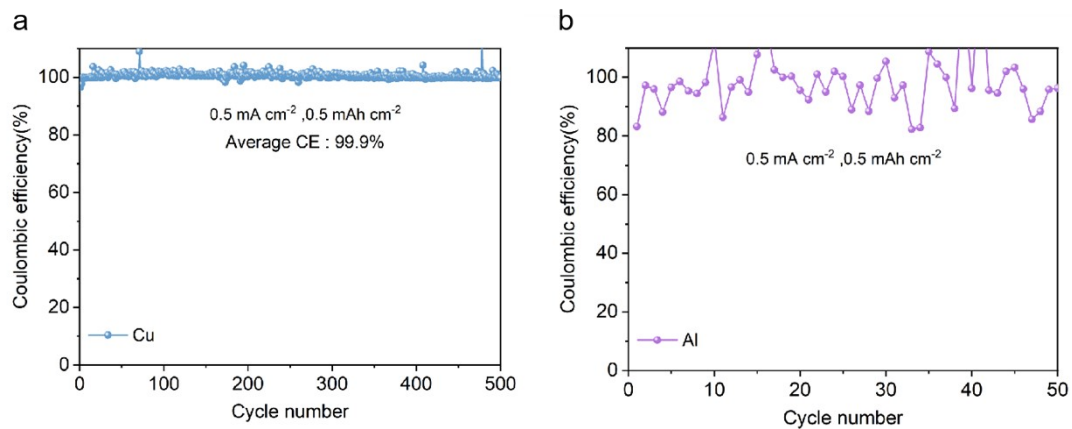

1

2 **Figure S8.** Coulombic efficiency of (a) Cu||Na cell and (b) Al||Na cell at  $0.5 \text{ mA cm}^{-2}$  for  $0.5 \text{ mAh}$   
 3  $\text{cm}^{-2}$ .

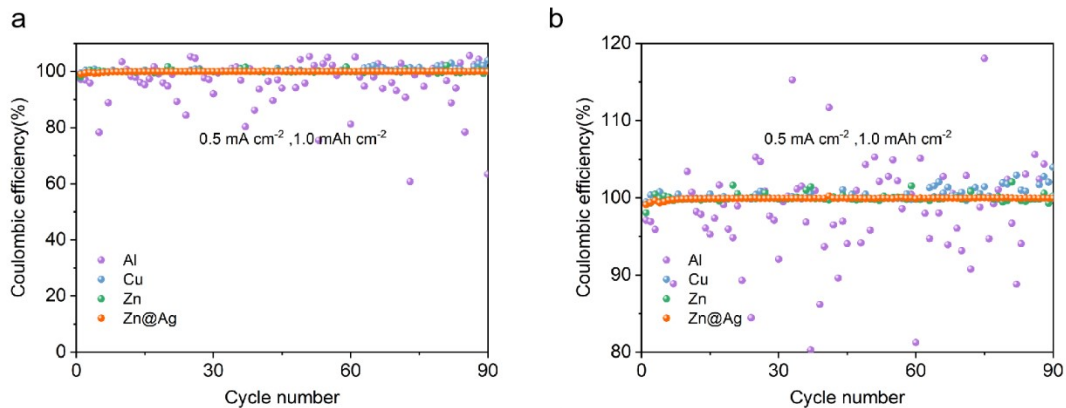

1  
2 **Figure S9.** (a) Coulombic efficiency of Na on Al, Cu, Zn, and Zn@Ag substrates at  $0.5 \text{ mA cm}^{-2}$  for  
3  $1.0 \text{ mAh cm}^{-2}$ . (b) Enlarged curve of (a).

4

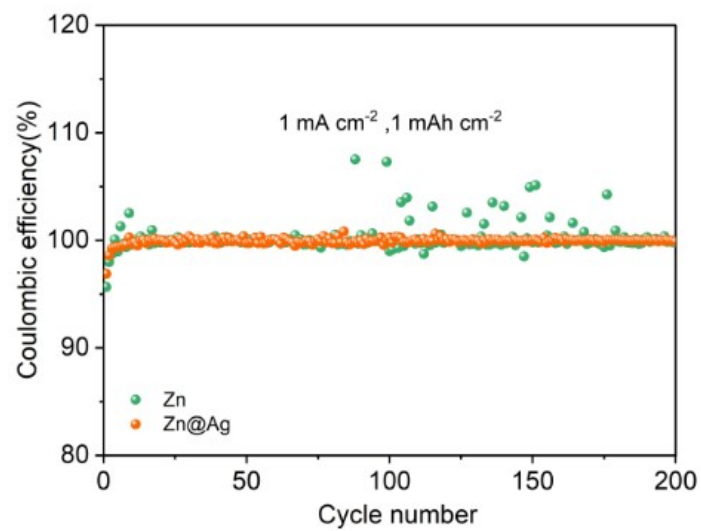

1

2 **Figure S10.** Coulombic efficiency of Zn||Na and Zn@Ag||Na cells at 1.0 mA cm<sup>-2</sup> for 1.0 mAh cm<sup>-2</sup>.

3

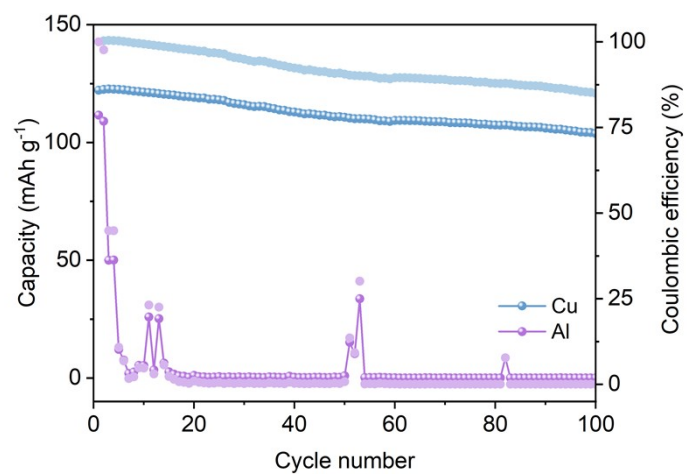

1

2 **Figure S11.** Cycling performance of anode-less Cu-Na||PB and Al-Na||PB half-cell at 50 mA g<sup>-1</sup>.

3

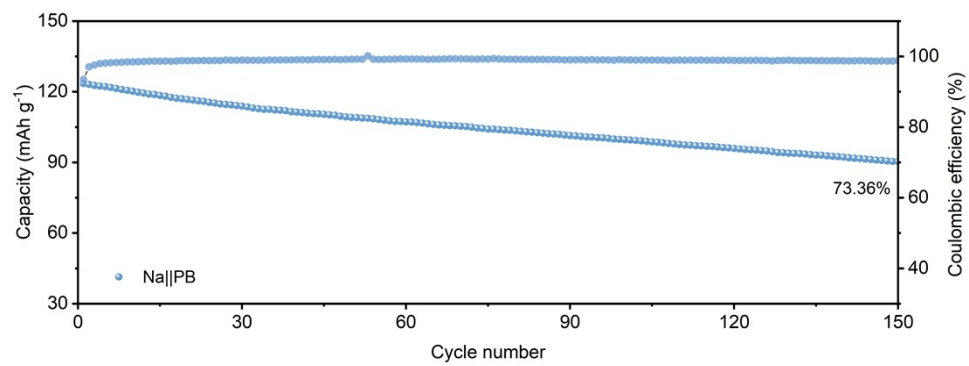

1

2 **Figure S12.** Cycling performance of Na||PB half-cell at 50 mA g<sup>-1</sup>.

3

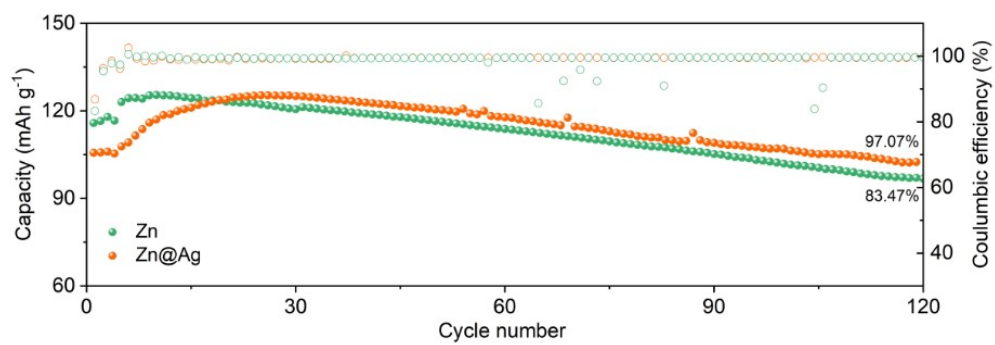

1

2 **Figure S13.** Cycling performance of anode-less Zn-Na||PB and Zn@Ag-Na||PB cells at 100 mA g<sup>-1</sup>.

3

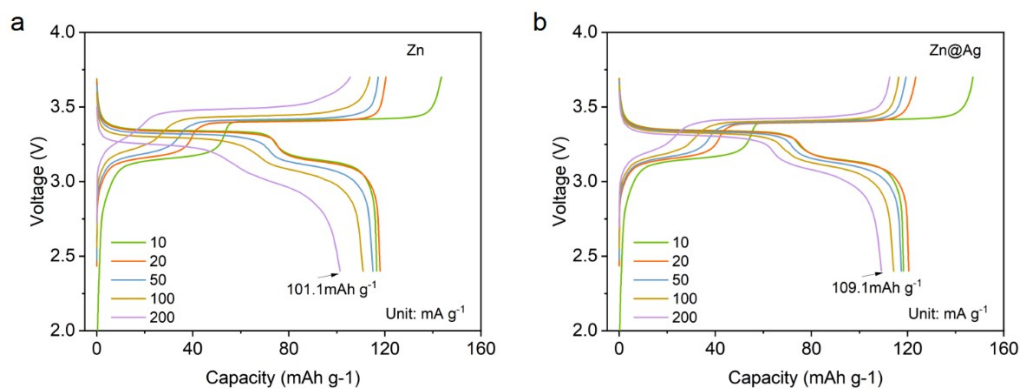

1  
2 **Figure S14.** Charge/discharge profiles of anode-less (a) Zn-Na||PB and (b) Zn@Ag-Na||PB cells during  
3 the rate performance.  
4

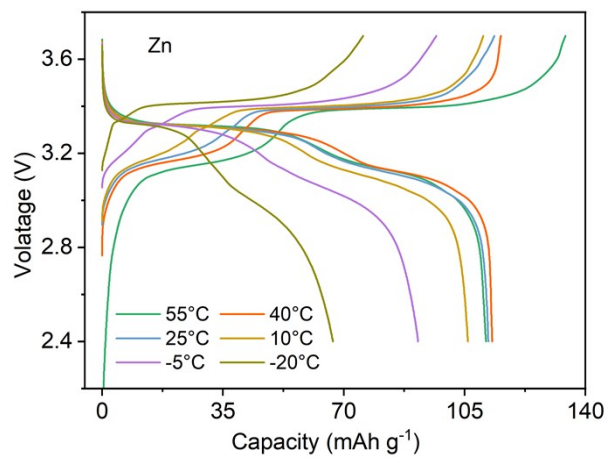

1

2 **Figure S15.** Charge/discharge profiles of anode-less Zn-Na||PB cell from 55 to -20 °C.

3

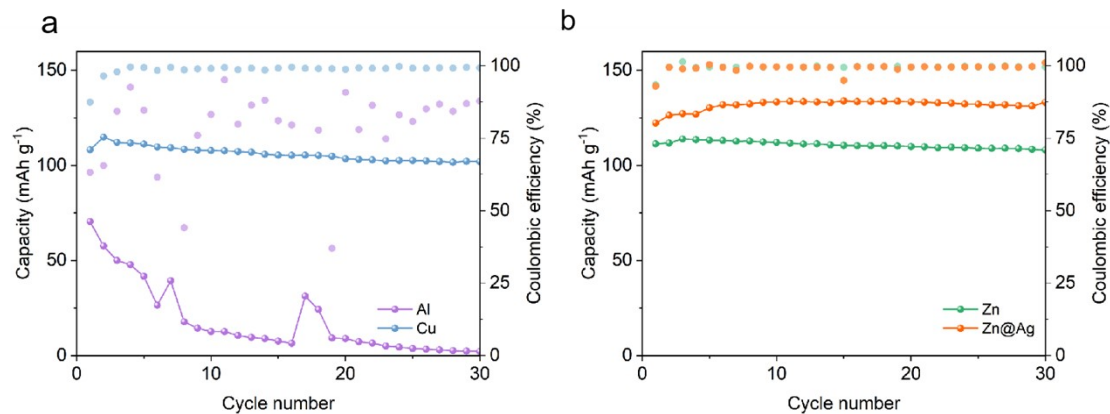

1  
2 **Figure S16.** Long-term cycling of anode-less (a) Al-Na||PB, Cu-Na||PB cell and (b) Zn-Na||PB,  
3 Zn@Ag-Na||PB cells at -20 °C.

4

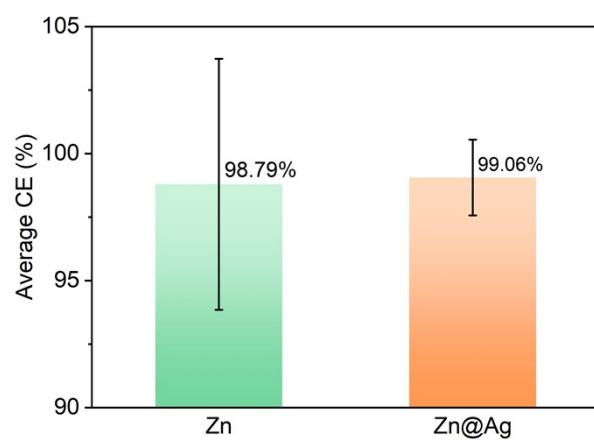

1

2 **Figure S17.** Average Coulombic efficiency of anode-free Zn||PB and Zn@Ag||PB cells.

3

**Table S1.** Radar map of various overpotentials and initial Na loss of Cu||Na, Al||Na, Zn||Na and Zn@Ag||Na cells.

| Substrate | $\eta_t$ (mV) | $\eta_p$ (mV) | $\eta_n$ (mV) | $\Delta E$ (mV) | Initial Na loss |
|-----------|---------------|---------------|---------------|-----------------|-----------------|
| Cu        | 20.7          | 4.7           | 16.0          | 10.0            | 3.5%            |
| Al        | 33.3          | 8.6           | 24.7          | 21.2            | 17.7%           |
| Zn        | 17.7          | 7.7           | 10.0          | 15.9            | 9.1%            |
| Zn@Ag     | 7.3           | 3.9           | 3.3           | 8.0             | 2.6%            |

3

4

5

## 6 References:

7 [1] Wan, F.; Zhou, X.; Lu, Y.; Niu, Z.; Chen, J. Energy Storage Chemistry in Aqueous Zinc Metal  
8 Batteries. *ACS Energy Lett.* **2020**, *5*, 3569-3590.

9 [2] Perdew, J. P.; Burke, K.; Ernzerhof, M. Generalized Gradient Approximation Made Simple. *Phys.*  
10 *Rev. Lett.* **1996**, *77*, 3865.

11 [3] Plieth, W. Electrochemistry for Materials Science; *Elsevier: Amsterdam*, **2008**; pp 195-203.

12 [4] Pei, A.; Zheng, G.; Shi, F.; Li, Y.; Cui, Y. Nanoscale Nucleation and Growth of Electrodeposited  
13 Lithium Metal. *Nano Lett.* **2017**, *17*, 1132-1139.

14 [5] Zhou, X.; Zhang, Q.; Hao, Z.; Ma, Y.; Drozhzhin, O. A.; Li, F. Unlocking the Allometric Growth  
15 and Dissolution of Zn Anodes at Initial Nucleation and an Early Stage with Atomic Force Microscopy.  
16 *ACS Appl. Mater. Interfaces* **2021**, *13*, 53227-53234.
